## RESEARCH ARTICLE

# Do CEOs with government work experience foster enterprise investment in pollution control?

Mixiang Peng<sup>1</sup>, Dayuan Li<sup>2\*</sup>, Chaolin Zhang<sup>3</sup>

**1** School of Business Administration, Zhejiang Gongshang University, Hangzhou, PR China, **2** School of Business, Central South University, Changsha, PR China, **3** The School of Finance, Hunan University of Technology and Business, Changsha, PR China

\* [lidayuan@csu.edu.cn](mailto:lidayuan@csu.edu.cn)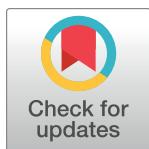

## Abstract

As enterprise leaders, CEOs play a critical role in driving enterprise investment in pollution control. However, few studies have explored the motivations behind enterprise investment in pollution control, primarily how CEOs' early experiences influence their decisions. Based on the perspective of imprinting theory, this study examines the impact of CEOs with government work experience on enterprise investment in pollution control and the boundary conditions of this impact. Using data from a survey of private enterprises in China from 2008 to 2014, the empirical results indicate that CEOs with government work experience are likelier to promote enterprise investment in pollution control. Additionally, a CEO's perceptions of economic, social, and political status negatively moderate the relationship between their government work experience and enterprise investment in pollution control. This study enriches and deepens the study on career imprinting in non-commercial fields, status perception, and sustainable development and provides practical significance for hiring CEOs with government work experience to promote enterprise investment in pollution control.

## OPEN ACCESS

**Citation:** Peng M, Li D, Zhang C (2025) Do CEOs with government work experience foster enterprise investment in pollution control? PLoS ONE 20(1): e0317903. <https://doi.org/10.1371/journal.pone.0317903>

**Editor:** Farzana Chowdhury, Durham University, UNITED KINGDOM OF GREAT BRITAIN AND NORTHERN IRELAND

**Received:** March 29, 2024

**Accepted:** December 31, 2024

**Published:** January 24, 2025

**Copyright:** © 2025 Peng et al. This is an open access article distributed under the terms of the [Creative Commons Attribution License](https://creativecommons.org/licenses/by/4.0/), which permits unrestricted use, distribution, and reproduction in any medium, provided the original author and source are credited.

**Data Availability Statement:** The data used in this study are third-party data owned by CPES (Chinese Private Enterprise Survey Database), therefore, the authors have no right to share the data. Interested persons can contact CPES for the data (see <https://cpes.zkey.cc/> for more details, contact via email: [cpes2018@126.com](mailto:cpes2018@126.com)). The authors confirm that they did not have any special access or privileges to the data that other researches would not have.

**Funding:** The authors acknowledge the outstanding project of Hunan Science Foundation

## 1. Introduction

As leaders of enterprises, CEOs bear significant responsibility for environmental governance, particularly concerning pollution control investments [1, 2]. They directly influence an enterprise's environmental performance by making strategic decisions, allocating resources, and ensuring the effective implementation of environmental measures [3]. For example, Andrew Liveris, the former CEO of Dow Chemical, leveraged his experience in developing environmental policies within international organizations to drive significant investments in pollution control technologies. However, CEOs exhibit varying performances in pollution control investments, indicating that a CEO's background may significantly impact this disparity [4]. For instance, former Volkswagen CEO Martin Winterkorn's experiences in the traditional automotive industry led him to prioritize profits over environmental responsibility, ultimately resulting in the emissions cheating scandal. Therefore, investigating how CEO's past experiences influence enterprises' investment in pollution control can provide valuable insights for

(No.2021JJ10066). The funders had no role in study design, data collection and analysis, decision to publish, or preparation of the manuscript.

**Competing interests:** The authors have declared that no competing interests exist.

leadership selection and enhance our understanding of enterprise environmental responsibility mechanisms.

In recent years, academia has conducted detailed research on the relationship between CEOs and enterprise environmental governance, which can be categorized into two types. The first type focuses on the innate traits of CEOs, such as gender [5], age [6], overconfidence [7], and emotional intelligence [8]. The second type examines how CEOs' acquired experiences influence enterprise environmental behavior. Existing studies indicate that CEOs with delegated authority [9], marketing experience [2], and professional backgrounds [10] significantly influence environmental governance. Unlike innate traits, acquired experiences provide CEOs with specialized knowledge and skills and shape their decision-making styles and cognitive patterns [11]. Consequently, scholars have explored the influence of acquired experiences on environmental governance, examining it from the perspectives of both commercial and non-commercial experiences.

Existing research has found a significant association between CEOs commercial experiences—such as marketing experience [2] and financial experience [12]—and environmental governance. CEOs' commercial experiences are typically aligned with enterprise economic development and contribute to improving enterprise performance [13]. By implementing environmental governance, CEOs aim to gain social recognition for their enterprises, enhance enterprise image, and promote economic growth. Therefore, environmentally driven behaviors influenced by commercial experience primarily aim to serve enterprise interests and are driven by external benefits [12, 14].

By contrast, CEOs with non-commercial experiences tend to exhibit environmental governance behaviors driven more by an internal sense of responsibility after entering profit-oriented enterprises. They are more likely to focus on fulfilling social responsibilities rather than pursuing economic benefits [11, 15]. This shift may lead them to face conflicts and dilemmas between economic development and social responsibility in their decision-making [16]. Against this backdrop, scholars have gradually begun to explore the impact of CEOs' non-commercial experiences on enterprise environmental governance. For instance, Zhang et al. [15] note that CEOs and board chairs with military backgrounds are more inclined to adopt environmentally friendly decisions when facing conflicts between economic development and social responsibility. Thus, while promoting enterprise economic growth, they focus on environmental governance, driving pollution control, and environmental innovation, which helps mitigate this conflict.

In addition to military experience, government work experience is another critical form of non-commercial experience for a CEO. However, research on the relationship between CEOs with government work experience and enterprise environmental governance remains incomplete [4], particularly regarding the lack of studies focusing on the connection between CEOs with government work experience and enterprise investment in pollution control. Despite the scarcity of related research, the service experience of CEOs in government departments can significantly enhance their attention to environmental governance and sustainable development issues [17, 18], as well as their relevant knowledge and capabilities. This experience may influence their decision-making processes within enterprises and directly drive enterprise investment in pollution control. Therefore, a deeper exploration of the relationship between CEOs with government work experience and enterprise investment in pollution control, along with its potential mechanisms, is critical for research.

Imprinting theory offers a compelling perspective on this issue. The imprinting theory posits that the characteristics formed during an individual's sensitive periods continue influencing their behavior and decision-making patterns even in dynamic environments [19, 20]. Simsek [19] indicates that the beginning of an individual's career is an important and sensitive period

because it represents a critical transition from education to the workforce. Even if they later change careers, their experiences during this early sensitive period will continue to impact their cognitive decision-making [21, 22]. When individuals leave government positions to work in the enterprise sector, they continue exhibiting decision-making behaviors characteristic of their government work, a phenomenon known as government imprinting. Therefore, government imprinting may be why CEOs with government work experience can promote enterprise investment in pollution control.

Furthermore, Simsek [19] suggests that imprints undergo dynamic changes after formation, including persisting, amplifying, decay, or transformation. When an individual leaves a government position and becomes a CEO, their status perception changes, affecting the impact of the government imprinting. Status perception refers to an individual's sense of value and respect based on their relative position within a specific group [23]. Weber [24] categorizes status perception into three dimensions: economic, social, and political, providing a practical framework for exploring how different types of status perception influence CEO decision-making. Research indicates that various dimensions of status perception can affect CEOs' decision-making styles. For instance, CEOs with high economic status perception are more likely to focus on short-term financial performance [25], while those with high social status perception prioritize enterprise social reputation [26]. In the context of enterprise investment in pollution control, a CEO's status perception may affect their environmental governance decisions by altering their responses to external pressures. Therefore, this study employs Weber's three-dimensional status perception framework to examine how different status perceptions affect the decision-making tendencies of CEOs with government work experience.

Based on this, our study integrates imprinting theory and status perception concepts to explore two essential but under-researched questions: How does a CEO with government work experience influence enterprise investment in pollution control? Second, does status perception strengthen or weaken the impact of a CEO with government work experience on enterprise investment in pollution control?

This study utilized survey data from Chinese private enterprises from 2008 to 2014 to investigate the relationship between CEOs with government work experience and enterprise investment in pollution control and the moderating role of status perception. The choice of Chinese private enterprises as the research sample was due to their significant role in China's economic development and environmental protection as representative of a developing country [27, 28]. The research findings indicate that CEOs with government work experience facilitate enterprise investment in pollution control. Furthermore, the moderation analysis reveals that perceptions of economic, social, and political statuses negatively moderate the positive relationship between CEOs with government work experience and enterprise investment in pollution control.

This study contributes to the literature in three main aspects. First, it examines the impact of CEOs with government work experience on enterprise investment in pollution control. This enriches the understanding of non-commercial experience career imprints and expands the application of imprinting theory in environmental governance [4, 11, 20]. We define the decision-making behavior formed by individual government work experience as "government imprinting," providing a new theoretical perspective for non-commercial experience career imprints. Second, we delineate the dimensions of status perception and analyze how these dimensions influence the relationship between CEOs with government work experience and enterprise investment in pollution control. This enriches the conceptual connotation and practical application of status perception [29, 30]. It contributes to the relevant literature, offering a theoretical basis for enterprises to utilize status perception in different contexts. Finally, this study analyzes the impact of CEOs with government work experience on enterprise

investment in pollution control from a micro-level perspective, emphasizing the role of individual government work experience and intrinsic sense of responsibility in promoting sustainable development. This study not only responds to the call by Mahran and Elamer [4] regarding how CEO experience affects environmental sustainability practices and outcomes but also offers new insights into the field of sustainable development.

## 2. Theoretical background and hypothesis development

### 2.1 Imprinting theory and government imprinting

Initially proposed by Stinchcombe [31], the imprinting theory suggests that the characteristics imprinted on organizations and individuals during sensitive periods persistently influence their behavior and decision-making patterns, even in dynamic environments [32]. Specifically, the theory entails three aspects: (1) the sensitive period, during which organizations and individuals are susceptible to external influences while undergoing transition; (2) the imprinting process, whereby organizations and individuals subconsciously adopt the behavior and decision-making patterns imparted by the environment during interaction; and (3) the persistent effect of imprints despite subsequent changes in the environment [19, 20].

Marquis and Tilcsik [20] indicate that early career experiences significantly impact individuals' career trajectories. These early experiences promote enterprise development, as observed in widely studied areas such as financial experience [33], entrepreneurial experience [34], and marketing experience [2]. However, research on the impact of non-commercial experiences, such as military experience [15], on enterprise development is relatively limited. Current studies primarily focus on the effects of CEOs' commercial experiences on enterprise development, while exploration of non-commercial experiences, particularly government work experience, must be improved. CEOs with government work experience can provide unique advantages for enterprise development, such as enhanced policy understanding and influence, as well as risk management and coping abilities [35, 36]. Therefore, this area warrants further attention.

Individuals working in government departments are referred to as civil servants. Civil servants are the executors of government policies and constitute the leading force in public administration and social governance [36, 37]. They are widely distributed across party and government organs, government departments, public institutions, and grassroots mass autonomous organizations. When civil servants leave government departments and enter the enterprise sector, they exhibit decision-making behavior characterized by governmental work, known as government imprinting.

Government imprinting is a multistage process primarily shaping individuals' behavior and decision-making through structure, cognition, and culture [19]. First, during individuals' sensitive periods, there is a restructuring of roles at the structural level. Approximately 70% of talents recruited by government departments are university graduates, a phase coinciding with the early stages of their careers, also known as the sensitive period in imprinting theory [19, 20]. Individuals are more likely to accept and adapt to new work patterns and embrace government departments' missions and responsibilities [38], thus undergoing structural role restructuring. Second, cognitive reshaping is used during the imprinting process. Governments at all levels select talents through rigorous and standardized procedures such as written tests, political reviews, and interviews [39, 40]. Precisely, written tests assess individuals' stress-coping abilities and basic civil service knowledge, while political reviews examine their ideological qualities and interpersonal attitudes [41]. Interviews assess individuals' comprehensive qualities, including knowledge, abilities, and ethics [40]. Through the complete selection process, individuals undergo cognitive reshaping. Third, after imprint formation, there is continuous cultural influence. Government departments regularly conduct training activities such as

education on party discipline and history and specialized training to enhance capabilities [42, 43]. These activities convey the concept of serving the people and building a service-oriented government to individuals in diverse forms, thus maintaining continuous cultural influence.

Simsek et al. [19] further suggest that it undergoes dynamic changes after imprint formation, including imprints persist, amplify, decay, and transform. Civil servants are highly esteemed by the public due to their rigorous selection and professional training, responsibility for managing public resources, direct service to the public, and stable employment with favorable welfare benefits [44]. When individuals leave government departments and become CEOs of enterprises, their perception of status changes, affecting the effectiveness of government imprinting. Therefore, leveraging imprinting theory, we examine the impact of CEOs with governmental work experience on enterprise investment in pollution control and explore the moderating role of status perception.

## 2.2 CEOs' government work experience and enterprise investment in pollution control

The imprinting theory posits that traits developed during an individual's sensitive period have a lasting influence on their future behavior and decision-making [19, 20]. Government imprinting, a specific application of imprinting theory, refers to how experiences in government shape individuals' subsequent decision-making patterns. CEOs with government work experience tend to exhibit unique behavior in enterprise investment in pollution control, which can be categorized into three aspects:

First, from a structural perspective, government work experience provides CEOs with a comprehensive framework for public management, particularly in risk management and crisis response. CEOs who possess government imprinting accumulate significant experience in managing environmental risks and public crises during their tenure in government [45, 46]. This background is instrumental when they transition into enterprise leadership roles, enabling them to recognize and address the long-term risks associated with environmental pollution, including legal, reputational, and financial vulnerabilities [47, 48]. Consequently, at the structural level, government imprinting encourages these CEOs to prioritize increased enterprise investment in pollution control initiatives to mitigate potential external risks.

Second, from a cognitive perspective, the mental frameworks developed through government work experience provide CEOs with distinct advantages in comprehending and responding to environmental policies and regulations [49]. During their early careers, the rigorous policy formulation and implementation processes within governmental contexts profoundly shaped their sensitivity to and foresight regarding environmental regulations. This heightened policy awareness enables them to anticipate regulatory changes effectively [4], facilitating the proactive adoption of measures that drive increased environmental investment within their organizations [3, 17]. Furthermore, their governmental background enhances their ability to communicate and collaborate effectively with government agencies [50, 51], thereby securing additional policy support and resources that further promote enterprise investment in pollution control.

Third, from a cultural perspective, the ingrained sense of responsibility and mission cultivated in the government work environment significantly influences CEOs' behavior. Their extensive public service includes rigorous training in party discipline and social responsibility [42, 43], fostering a profound sense of social obligation [52]. This responsibility compels them to focus not only on their organizations economic interests but also to perceive the enterprise as part of society, willingly embracing greater social responsibilities [53, 54]. Consequently, these CEOs are inclined to advocate for increased enterprise investment in pollution control,

fulfilling their commitments to environmental stewardship [55, 56] and enhancing their organizations' social reputation.

In summary, CEOs with government work experience tend to drive enterprise investment in pollution control more vigorously due to the multifaceted influence of government imprinting across structural, cognitive, and cultural dimensions. These imprints enhance proactivity in addressing environmental risks, comprehending policy mandates, and assuming social responsibilities, thereby facilitating increased enterprise investments in pollution control efforts. Based on this, the study proposes the following hypothesis:

**Hypothesis 1.** CEOs with government work experience are positively associated with enterprise investment in pollution control.

### 2.3 Moderating effect of CEOs' status perception

Early experiences working in the government impact CEOs' cognition and decision-making, fostering investments in environmental governance within their enterprises. Although imprinting has a lasting effect on individuals, this effect is dynamic and adjusts with environmental changes [1, 19]. In China, organizational types are classified into five categories: government, state-owned enterprises, foreign enterprises, private enterprises, and others [27]. Government and state-owned enterprises are perceived as high-status organizations [27]. Therefore, when a CEO transitions from a government department to an enterprise, the government imprinting formed during the critical period still exists. However, changes in the work environment may alter their self-perceived status, thereby influencing the extent of the government imprinting effect.

Status perception refers to an individual's sense of being valued and respected based on their relative status within a specific group [23]. Weber posited that individuals primarily assess their status based on their economic status (wealth and income), political status (power), and social status (prestige) [24]. Previous research has demonstrated that a CEO's economic, political, and social status can influence decision-making in different enterprise aspects [27, 28, 38]. Therefore, we will discuss in detail how the three dimensions of status perception each moderate the relationship between CEOs with government work experience and enterprise investment in pollution control.

**2.3.1 Moderating effect of CEOs' economic status perception.** When a CEO transitions from a governmental department to an enterprise, there are corresponding changes and fluctuations in their perceived economic status. This is due to significant differences in how salaries are distributed between governmental departments and enterprises. Salaries in governmental departments are relatively lower but stable [57], thus resulting in less fluctuation in the economic status perception. However, salaries are primarily based on individual contributions to enterprise performance [58, 59], leading to more significant variability and instability. Therefore, a CEO's economic status perception becomes more volatile upon entering an enterprise. According to the imprinting theory, once individual imprinting is formed, dynamic changes in the surrounding environment also affect the effectiveness of this imprint [19, 20]. Based on this, a CEO's economic status perception weakens the influence of the government imprinting, negatively moderating the positive correlation between a CEO's governmental work experience and enterprise investment in pollution control. Specifically, this is manifested in the following two aspects:

First, the higher the CEO's economic status perception, the more they become aware of the intensity of the enterprise's competitive environment, thus weakening the influence of their government imprinting cognitively. When a CEO has a higher economic status perception, they gain a deeper understanding of the enterprise's internal and external competitive

dynamics [60]. Enterprises must continually innovate and enhance efficiency to maintain and improve their competitive edge [61]. This intense competition demands CEOs to direct more attention and resources to projects that enhance enterprise performance, such as market expansion, product development, and cost control [62, 63]. Conversely, pollution control investment, while essential, may have lower short-term economic returns and could therefore be deprioritized [64]. Consequently, owing to the pressure of this competitive environment, CEOs gradually diminish the impact of their early governmental work experience on their awareness of pollution control [65], shifting their focus toward the enterprise's economic performance and market competitiveness.

Second, the higher the CEO's economic status perception, the more they can perceive the differences between the development of enterprises and governmental departments, thus weakening the influence of their government imprinting structurally. CEOs with a high economic status perception can better understand the fundamental disparities between enterprise and governmental operations [18]. Governmental departments prioritize public service and social responsibility [18], with decision-making processes being relatively stable and standardized and supported by national financial backing, resulting in stable salaries and positions. In contrast, enterprises primarily aim for profitability, with decision-making being flexible and responsive to market changes, salaries, and positions closely tied to individual performance [4, 64]. These operational differences lead high-economic-status-perceiving CEOs to prioritize flexibility and market orientation in enterprise management rather than the stability and standardization of governmental departments [66, 67]. As they gain a deeper understanding of enterprise structure and development models, the pollution control awareness and sense of social responsibility formed during their early governmental experience gradually diminish in practical enterprise operations [52], weakening the influence of the government imprinting structurally.

High economic status perception makes CEOs more inclined toward flexible and market-oriented management approaches in cognition and structure [64], weakening the effect of the government imprinting. Consequently, CEOs with higher economic status perception focus more on the enterprise's competitive environment and profit objectives [34, 68], diminishing the impact of their governmental work experience on pollution control investment. Based on this, the following hypothesis is proposed:

**Hypothesis 2a.** CEO economic status perception weakens the positive relationship between CEOs with government work experience and enterprise investment in pollution control.

**2.3.2 Moderating effect of CEOs' social status perception.** When CEOs transition from governmental departments to enterprises, their social status perception also changes. Governmental departments are characterized by public service and altruism [18], leading individuals working in such departments to be perceived as having higher social status by the public [27]. Conversely, enterprises primarily aim for profit, offering goods and services for compensation [69]. CEOs' social status perception influences the public's evaluation of the enterprise's products and services [70]. According to imprinting theory, dynamic changes in the surrounding environment can influence the sustained effects of imprinting [19, 20]. Therefore, CEOs' social status perception weakens the impact of government imprinting, negatively moderating the positive correlation between CEOs with governmental work experience and enterprise investment in pollution control. Specifically, this is mainly manifested in the following two aspects:

First, the higher the CEO's social status perception, the more likely they are to choose social responsibility actions that balance public interest with enterprise benefits [71], thereby weakening the influence of government imprinting on a cognitive level. The sources and manifestations of high social status perception are diverse [72, 73], and CEOs do not necessarily fulfill public expectations through enterprise investment in pollution control. They can achieve

social responsibility goals through immediate measures such as charitable donations or by enhancing employee welfare [74, 75]. These measures can satisfy social expectations while promoting enterprise development, thus increasing employee motivation and improving enterprise performance. By contrast, enterprise investment in pollution control requires substantial ongoing financial resources and occupies economic capital with a more extended return period [76]. Therefore, on a cognitive level, CEOs with high social status perception may be more inclined to choose actions that can achieve social value in the short term, leading to a behavior orientation that weakens the impact of government imprinting when addressing environmental issues.

Second, the higher the CEO's social status perception, the more influenced they are by the social networks of peer entrepreneurs, thereby culturally weakening the role of government imprinting. CEOs with a high perception of social status typically have broader social networks, particularly with similar entrepreneurs [77, 78]. These network relationships indicate that they are influenced by other entrepreneurs in their industry when making business decisions [79], leading them to focus more on operational efficiency than social responsibility. The entrepreneurial culture emphasizes business success and performance, relegating social responsibility to a secondary position. Frequent interactions with other entrepreneurs may prompt CEOs to pursue short-term economic benefits while neglecting long-term environmental responsibilities [80]. Therefore, on a cultural level, CEOs with high social status perceptions are influenced by the values of the entrepreneurial community [26], further diminishing the impact of government imprinting on pollution control decisions.

In summary, a high perception of social status among CEOs affects the effectiveness of government imprinting through cognitive and cultural dimensions, thereby weakening the positive relationship between CEOs with government work experience and enterprise investment in pollution control. Based on this, we propose the following hypothesis:

**Hypothesis 2b.** CEO social status perception weakens the positive relationship between CEOs with government work experience and enterprise investment in pollution control.

**2.3.3 Moderating effect of CEOs' political status perception.** When a CEO transitions from a governmental position to an enterprise role, their political status perception changes significantly. Government officials typically enjoy higher political status and power, often being directly influenced and supported by policies and the political environment in decision-making processes [37]. However, upon entering the enterprise sector, the CEO's political status perception becomes more complex and variable as enterprise operations are primarily driven by market forces, requiring quick adaptation and response to market changes [22, 81]. Consequently, the CEO's political status perception becomes more dependent on the enterprise's performance in the market and its contribution to enterprise achievements [47, 82]. According to imprinting theory, changes in the individual's environment can significantly moderate the effect of imprinting over time [19, 20]. Therefore, the CEO's political status perception weakens the impact of government imprinting, negatively moderating the positive correlation between the CEO with governmental work experience and enterprise investment in pollution control. Specifically, this is manifested in the following two aspects:

First, the higher the CEO's political status perception, the more likely they are to gain early access to dynamic national policy information, thereby weakening the influence of government imprinting on resource allocation. CEOs with a heightened political status perception can promptly acquire insights into policy changes and trends, enabling them to swiftly mitigate risks and adjust strategies [83]. However, because pollution control investment does not typically yield immediate economic returns or competitive advantages in the short term [84], these CEOs are more inclined to allocate resources toward projects such as innovation and market expansion, which can rapidly enhance enterprise performance [81]. Consequently, a

heightened political status perception tends to lower the priority of enterprise investment in pollution control [15], diminishing the impact of government imprinting on pollution control investment decisions.

Second, the higher the CEO's political status perception, the more they can leverage their political resources and connections to secure additional development opportunities for the enterprise, thereby weakening the influence of their government imprinting on strategic decisions. CEOs with a high political status perception typically possess extensive political resources and networks [85], enabling them to leverage these assets to secure policy incentives, government contracts, or other benefits for the enterprise [86]. In such cases, CEOs prioritize allocating resources and efforts toward projects that yield immediate economic benefits, such as entering new markets or upgrading technologies [87], rather than toward pollution control initiatives that may yield little tangible results in the short term. Although they may have developed a strong awareness of pollution control during their tenure in government [88], the urgent economic demands of the enterprise tend to diminish their focus on pollution control in practical enterprise management [64], thus weakening the influence of their government imprinting on strategic decisions.

CEOs with a high political status perception are more inclined to allocate resources toward projects that can rapidly enhance enterprise performance and utilize their political resources to secure more development opportunities [49, 89], thereby diminishing the influence of their government imprinting on pollution control decisions. Based on this, we propose the following hypothesis:

**Hypothesis 2c.** CEO political status perception weakens the positive relationship between CEOs with government work experience and enterprise investment in pollution control.

### 3. Research methodology

#### 3.1 Sample and data source

China is an ideal empirical context for this study, given the crucial role private enterprises play in driving economic development and environmental protection [29]. Our research sample is obtained from the Chinese Private Enterprise Survey (CPES) database, updated biennially and widely used in organizational and management research on Chinese small and medium enterprises (SMEs). This database is recognized as an authoritative and reliable source for obtaining data on private enterprises in China [27, 28], providing the foundation for testing our hypotheses [90].

We select data from 2008, 2010, 2012, and 2014 to investigate the relationship between CEOs with government work experience and enterprise investment in pollution control for two reasons. First, the dataset provides unique, detailed information on CEOs' government work experience and subjective status perception, which are critical variables for our study and not readily available in other data sources [91]. Second, the dataset offers comprehensive, high-quality information on private enterprises and their CEOs, ensuring that our sample accurately represents China's private sector, thereby enhancing the robustness of our findings.

In recent years, numerous scholars have also leveraged CPES data from 2008 to 2014 to explore enterprise environmental issues. For instance, Fu et al. [92] use the 2012 data to explore the effects of environmental regulation on enterprise performance, while Yan and Xu [93] examine the impact of political party cooperation on enterprise environmental investment using data from 2006 to 2014.

### 3.2 Regression models

To test these hypotheses, we construct the following verification model: Model (1) tests the relationship between CEOs with government work experience and enterprise investment in pollution control. Models 2 to 4 mainly test the moderating effect of CEO status perception.

$$\begin{aligned} \text{Logit}(EI \cdot \text{Pollution} \cdot \text{Control}) &= \ln \frac{EI \cdot \text{Pollution} \cdot \text{Control}}{1 - EI \cdot \text{Pollution} \cdot \text{Control}} \\ &= \alpha_0 + \alpha_1 \cdot \text{GWCEO} + \alpha_2 \cdot \text{CV}_S + \alpha_3 \cdot \text{Year} + \alpha_4 \cdot \text{Area} + \varepsilon \end{aligned} \quad (1)$$

$$\begin{aligned} \text{Logit}(EI \cdot \text{Pollution} \cdot \text{Control}) &= \ln \frac{EI \cdot \text{Pollution} \cdot \text{Control}}{1 - EI \cdot \text{Pollution} \cdot \text{Control}} \\ &= \beta_{10} + \beta_{11} \cdot \text{GWCEO} + \beta_{12} \cdot \text{ES} \cdot \text{Perception} + \beta_{13} \cdot \text{ES} \cdot \text{Perception} \cdot \text{GWCEO} + \beta_{14} \cdot \text{CV}_S \\ &\quad + \beta_{15} \cdot \text{Year} + \beta_{16} \cdot \text{Area} + \delta_1 \end{aligned} \quad (2)$$

$$\begin{aligned} \text{Logit}(EI \cdot \text{Pollution} \cdot \text{Control}) &= \ln \frac{EI \cdot \text{Pollution} \cdot \text{Control}}{1 - EI \cdot \text{Pollution} \cdot \text{Control}} \\ &= \beta_{20} + \beta_{21} \cdot \text{GWCEO} + \beta_{22} \cdot \text{SS} \cdot \text{Perception} + \beta_{23} \cdot \text{SS} \cdot \text{Perception} \cdot \text{GWCEO} + \beta_{24} \cdot \text{CV}_S \\ &\quad + \beta_{25} \cdot \text{Year} + \beta_{26} \cdot \text{Area} + \delta_2 \end{aligned} \quad (3)$$

$$\begin{aligned} \text{Logit}(EI \cdot \text{Pollution} \cdot \text{Control}) &= \ln \frac{EI \cdot \text{Pollution} \cdot \text{Control}}{1 - EI \cdot \text{Pollution} \cdot \text{Control}} \\ &= \beta_{30} + \beta_{31} \cdot \text{GWCEO} + \beta_{32} \cdot \text{PS} \cdot \text{Perception} + \beta_{33} \cdot \text{PS} \cdot \text{Perception} \cdot \text{GWCEO} + \beta_{34} \cdot \text{CV}_S \\ &\quad + \beta_{35} \cdot \text{Year} + \beta_{36} \cdot \text{Area} + \delta_3 \end{aligned} \quad (4)$$

Where GWCEO is the independent variable, which is the CEO with government work experience; ES perception, SS perception, and PS perception are the moderating variables, which are CEO status perception; and CVs are the control variables, specifically, CEO sex, CEO age, CEO political connection, enterprise age, enterprise industry, and provincial GDP. In addition, the year of the sample and enterprise area are considered control variables.

### 3.3 Variables and measures

**3.3.1 Dependent variable.** To measure *enterprise investment in pollution control (EI pollution control)*, we also use a dummy variable that takes the value of 1 if the enterprise invested in pollution control and 0 otherwise. The final value range is 0–1, with an average value of 0.355. Our dataset shows that 4503 enterprises have invested in pollution control.

**3.3.2 Independent variable.** Deputies to the National People's Congress and Chinese People's Political Consultative Conference members are the most important official contacts between Chinese private entrepreneurs and the Chinese government [89, 94]. Holding a post in the administrative department of the government does not depend on political connections because it is illegal for government officials to engage in private enterprise in China [94]. In the survey, we define CEOs with government work experience (GWCEO) by including a dummy variable that takes the value of 1 if the CEO has previously worked in the Party, government, or public institution and 0 otherwise.

**3.3.3 Moderating variables.** In the survey, CEOs were asked to use the MacArthur Ladder Scale to assess their status from economic, social, and political dimensions [95], following Weber's theory of social stratification [24, 26]. The initial question in the questionnaire was: "Compared to other members of society around you, where do you think you stand on the social ladder in terms of economic (social or political) aspects?" (Scores range from 1–10, with

higher scores indicating weaker perceived status). We adopted the method proposed by Uddin [96] to classify CEOs' perceived status into high and low groups to study their different impacts. Following the study by Li et al. [67], the respondents' scores were reverse-coded for a more straightforward analysis. Specifically, we assigned a value of 1 to scores below 5, indicating high perceived status for the CEO, and a value of 0 to scores above 5, indicating low perceived status for the CEO.

**3.3.4 Control variables.** We select several variables to control for probable influences on the independent variables. At the CEO level, we control for *CEO sex* by including a dummy variable that takes the value of 1 if the CEO is female and 0 if the CEO is male; *CEO age* is measured by the year of the questionnaire minus the CEO's year of birth, and *CEO political connection* by including a dummy variable that takes the value of 1 if the CEO is a representative of the National People's Congress or the Chinese People's Political Consultative Conference, and 0 otherwise.

At the enterprise level, we measure the *enterprise age* as the year of the questionnaire minus the year the enterprise was registered as a private enterprise. According to the guidelines for environmental information disclosure of listed enterprises (Exposure Draft) in 2010 and combined with the characteristics of private enterprises, the five industries of mining, manufacturing, electricity, gas and water, construction, and transportation are considered heavy pollution industries, and the rest are light pollution industries. Therefore, we control the *enterprise industry* by including a dummy variable that takes the value of 1 if the enterprise is a heavy pollution industry and 0 otherwise. We measure *provincial GDP* using the natural logarithm of the previous year's provincial GDP. To account for whether area conditions play a role in enterprise investment in pollution control, we control the *enterprise area* using a dummy variable that takes the value of 1 if the enterprise belongs to the eastern area and 0 otherwise. Finally, we control for time effects by including the corresponding dummy variables for the years under study. Table 1 details the definitions of the variables.

## 4. Results and analysis

Table 2 presents descriptive statistics and Pearson's correlations. In our sample, the mean enterprise investment in pollution control is 0.355, indicating that enterprise investment in pollution control is generally low. The average value of CEOs with government work experience is 0.154, indicating that most CEOs of private Chinese enterprises in our sample have no government work experience. The variance inflation factor (VIF) values are all less than 3, and the mean VIF is 1.47, indicating multicollinearity between these variables is not a serious problem.

Table 3 presents the analyses of the hypotheses. Model 1 contains only the control variables. Model 2 adds independent variables; Models 3 to 5 include status perception variables and the CEO and status perception interaction items. Hypothesis 1 posits that a CEO with government work experience positively correlates with enterprise investment in pollution control. Model 2 shows that a CEO with government work experience significantly impacts enterprise investment in pollution control ( $\beta = 0.106$ ,  $p = 0.047 < 0.05$ ). Therefore, H1 is supported.

Models 3 to 5 present the moderating role of CEO status perception. The regression results in column (3) of Table 3 show that CEOs' economic status perception significantly and negatively moderates the relationship between CEOs with government work experience and enterprise investment in pollution control. The coefficient of the interaction term (GWCEO\*ES Perception) is -0.234, passing the significance test at the 5% level ( $p = 0.037 < 0.05$ ); thus, H2a is supported. This shows that low economic status perception weakens the positive relationship between CEOs with government work experience and enterprise investment in pollution control.

**Table 1. Variable definition.**

| Variable             |                          | Definition                                                                                                                                                                                                                                                                                                    |
|----------------------|--------------------------|---------------------------------------------------------------------------------------------------------------------------------------------------------------------------------------------------------------------------------------------------------------------------------------------------------------|
| Dependent Variable   | EI Pollution Control     | Takes the value of 1 if an enterprise has pollution control investment, and 0 otherwise.                                                                                                                                                                                                                      |
| Independent Variable | GWCEO                    | Takes the value of 1 if a CEO has government work experience, and 0 otherwise.                                                                                                                                                                                                                                |
| Moderating Variables | ES Perception            | The CEO's economic status perception is coded as 1 to 10, with higher values indicating lower status perception. To handle reverse scoring, values above 5 are coded as 0, representing low economic status perception, while values below 5 are coded as 1, representing high economic status perception.    |
|                      | SS Perception            | The CEO's social status perception is coded as 1 to 10, with higher values indicating lower status perception. To handle reverse scoring, values above 5 are coded as 0, representing low social status perception, while values below 5 are coded as 1, representing high social status perception.          |
|                      | PS Perception            | The CEO's political status perception is coded as 1 to 10, with higher values indicating lower status perception. To handle reverse scoring, values above 5 are coded as 0, representing low political status perception, while values below 5 are coded as 1, representing high political status perception. |
| Control Variables    | CEO Sex                  | CEO sex takes the value of 1 if the CEO is female and 0 otherwise.                                                                                                                                                                                                                                            |
|                      | CEO Age                  | CEO age equals the year of the questionnaire minus the CEO's birth year.                                                                                                                                                                                                                                      |
|                      | CEO Political Connection | Takes the value of 1 if the CEO is a representative of the National People's Congress or the Chinese People's Political Consultative Conference, and 0 otherwise.                                                                                                                                             |
|                      | Enterprise Age           | The length of enterprise establishment equals the year of the questionnaire minus the year when the enterprise was registered as a private enterprise.                                                                                                                                                        |
|                      | Enterprise Industry      | Enterprise industry takes a value of 1 if the industry experiences heavy pollution and 0 otherwise.                                                                                                                                                                                                           |
|                      | Provincial GDP           | The logarithm of provincial GDP in the previous year.                                                                                                                                                                                                                                                         |
|                      | Year                     | The year of the sample.                                                                                                                                                                                                                                                                                       |
|                      | Area                     | Takes the value of 1 if the area is in the eastern region, and 0 otherwise.                                                                                                                                                                                                                                   |

Notes: According to the guidelines for environmental information disclosure of listed enterprises (Exposure Draft) in 2010, combined with the characteristics of private enterprises, the mining, manufacturing, electricity, gas and water, construction, and transportation industries are heavy-pollution industries, while the rest are light-pollution industries.

<http://doi.org/10.1371/journal.pone.0317903.t001>

<https://doi.org/10.1371/journal.pone.0317903.t001>

The regression results in column (4) of Table 3 show that CEOs' social status perception significantly negatively moderates the relationship between CEOs with government work experience and enterprise investment in pollution control. The coefficient of the interaction term (GWCEO\*SS Perception) is -0.253, passing the significance test at the 5% level ( $p = 0.024 < 0.05$ ); thus, H2b is supported. This indicates that low social status perception weakens the government imprinting effect; that is, the positive impact of CEOs with government work experience on enterprise investment in pollution control is diminished by low social status perception.

The regression results in column (5) of Table 3 show that the CEO's political status perception has a significant negative moderating effect on the relationship between CEOs with government work experience and enterprise investment in pollution control. The coefficient of the interaction term (GWCEO\*PS Perception) is -0.241, passing the significance test at the 5% level ( $p = 0.024 < 0.05$ ); thus, H2c is supported. This shows that low political status perception weakens the positive relationship between CEOs with government work experience and enterprise investment in pollution control.

Table 2. Descriptive statistics and Pearson correlation coefficients.

|                             | Mean   | SD    | 1        | 2         | 3        | 4        | 5        | 6        | 7        | 8         | 9        | 10       | 11       | 12 |
|-----------------------------|--------|-------|----------|-----------|----------|----------|----------|----------|----------|-----------|----------|----------|----------|----|
| 1. EI Pollution Control     | 0.355  | 0.479 | 1        |           |          |          |          |          |          |           |          |          |          |    |
| 2. GWCEO                    | 0.154  | 0.361 | 0.023*** | 1         |          |          |          |          |          |           |          |          |          |    |
| 3. ES Perception            | 0.589  | 0.492 | 0.147*** | 0.036***  | 1        |          |          |          |          |           |          |          |          |    |
| 4. SS Perception            | 0.587  | 0.492 | 0.146*** | 0.036***  | 0.714*** | 1        |          |          |          |           |          |          |          |    |
| 5. PS Perception            | 0.483  | 0.500 | 0.145*** | 0.046***  | 0.552*** | 0.670*** | 1        |          |          |           |          |          |          |    |
| 6. CEO Sex                  | 0.854  | 0.354 | 0.092*** | 0.010     | 0.073*** | 0.068*** | 0.074*** | 1        |          |           |          |          |          |    |
| 7. CEO Age                  | 46.037 | 8.392 | 0.104*** | 0.100***  | 0.104*** | 0.113*** | 0.140*** | 0.098*** | 1        |           |          |          |          |    |
| 8. CEO Political Connection | 0.663  | 0.473 | 0.136*** | 0.056***  | 0.131*** | 0.162*** | 0.231*** | 0.068*** | 0.104*** | 1         |          |          |          |    |
| 9. Enterprise Age           | 9.472  | 5.427 | 0.150*** | 0.038***  | 0.152*** | 0.156*** | 0.178*** | 0.075*** | 0.345*** | 0.124***  | 1        |          |          |    |
| 10. Enterprise industry     | 0.524  | 0.499 | 0.242*** | -0.021**  | 0.109*** | 0.104*** | 0.104*** | 0.130*** | 0.154*** | 0.103***  | 0.149*** | 1        |          |    |
| 11. Provincial GDP          | 28.144 | 0.832 | 0.094*** | -0.040*** | 0.100*** | 0.081*** | 0.064*** | 0.052*** | 0.049*** | -0.162*** | 0.154*** | 0.124*** | 1        |    |
| 12. Area                    | 0.577  | 0.494 | 0.008    | -0.017**  | 0.075*** | 0.056*** | 0.033*** | 0.027*** | 0.016*   | -0.010    | 0.127*** | 0.096*** | 0.525*** | 1  |

Note

\*, \*\*, \*\*\* indicate statistical significance at the 10%, 5%, and 1% level, respectively.

<http://doi.org/10.1371/journal.pone.0317903.t002>

<https://doi.org/10.1371/journal.pone.0317903.t002>

We further map the moderating effects. Figs 1–3 show that when CEOs have a low-status perception, as the number of CEOs with government work experience increases, enterprise investment in pollution control will be further weakened.

### 5. Robustness test and endogeneity concerns

Replacement regression method: probit regression. A probit regression is used to retest the main and moderating effects, and the results are shown in Table 4. CEOs with government work experience and enterprise investment in pollution control still show a significant positive correlation ( $\beta = 0.063, p = 0.054 < 0.1$ ). The interaction coefficient between CEOs’ economic status perception and CEOs with government work experience is negative and significant ( $\beta = -0.142, p = 0.036 < 0.05$ ). The interaction coefficient between CEOs’ social status perception and CEOs with government work experience is negative and significant ( $\beta = -0.156, p = 0.021 < 0.05$ ). The interaction coefficient between CEOs’ political status perception and CEOs with government work experience is negative and significant ( $\beta = -0.145, p = 0.025 < 0.05$ ). Except for the significance level of the main effect decreasing from 5% to 10%, the other results are consistent; thus, H1 to H2c are still supported.

Endogeneity problems caused by sample selection: Heckman two-stage model. There may be endogeneity (or self-selection) between CEOs with government work experience and enterprise investment in pollution control. CEOs with government work experience may be determined by some external factors of the enterprise and the CEOs’ characteristics rather than randomly. To make our conclusion more reliable, we use a Heckman two-stage model to control for the endogeneity of the samples. In the first step of the probit regression analysis, we build the following model:

$$\begin{aligned}
 \text{Probit}(\text{CEO} \cdot \text{Edu}) &= \Phi^{-1}(\text{CEO} \cdot \text{Edu}) \\
 &= \gamma_0 + \gamma_1 \cdot \text{CEO} \cdot \text{Gender} + \gamma_2 \cdot \text{CEO} \cdot \text{Age} + \gamma_3 \cdot \text{CEO} \cdot \text{Political} \cdot \text{Connection} + \gamma_4 \cdot \text{Year} \\
 &\quad + \gamma_5 \cdot \text{Area} + \theta
 \end{aligned}
 \tag{5}$$

The inverse mills ratio (IMR) calculated in the first step is used as the control variable in the second step of regression to address the samples’ endogeneity. The second-stage regression results

Table 3. Regression results for CEOs with government work experience and enterprise investment in pollution control (Logit).

| Variables                | EI Pollution Control |           |           |           |           |
|--------------------------|----------------------|-----------|-----------|-----------|-----------|
|                          | Model 1              | Model 2   | Model 3   | Model 4   | Model 5   |
| GWCEO                    |                      | 0.106**   | 0.110**   | 0.114**   | 0.116**   |
|                          |                      | (-0.054)  | (-0.054)  | (-0.054)  | (-0.054)  |
| GWCEO*ES Perception      |                      |           | -0.234**  |           |           |
|                          |                      |           | (-0.112)  |           |           |
| GWCEO*SS Perception      |                      |           |           | -0.253**  |           |
|                          |                      |           |           | (-0.112)  |           |
| GWCEO*PS Perception      |                      |           |           |           | -0.241**  |
|                          |                      |           |           |           | (-0.106)  |
| ES Perception            |                      |           | 0.419***  |           |           |
|                          |                      |           | (-0.042)  |           |           |
| SS Perception            |                      |           |           | 0.399***  |           |
|                          |                      |           |           | (-0.042)  |           |
| PS Perception            |                      |           |           |           | 0.328***  |
|                          |                      |           |           |           | (-0.041)  |
| CEO Sex                  | 0.331***             | 0.331***  | 0.309***  | 0.312***  | 0.316***  |
|                          | (-0.060)             | (-0.060)  | (-0.060)  | (-0.060)  | (-0.060)  |
| CEO Age                  | 0.006**              | 0.005**   | 0.005*    | 0.004*    | 0.004     |
|                          | (-0.003)             | (-0.003)  | (-0.003)  | (-0.003)  | (-0.003)  |
| CEO Political Connection | 0.754***             | 0.748***  | 0.683***  | 0.666***  | 0.648***  |
|                          | (-0.053)             | (-0.053)  | (-0.053)  | (-0.054)  | (-0.054)  |
| Enterprise Age           | 0.032***             | 0.032***  | 0.029***  | 0.029***  | 0.029***  |
|                          | (-0.004)             | (-0.004)  | (-0.004)  | (-0.004)  | (-0.004)  |
| Enterprise industry      | 0.928***             | 0.931***  | 0.916***  | 0.919***  | 0.922***  |
|                          | (-0.041)             | (-0.041)  | (-0.041)  | (-0.041)  | (-0.041)  |
| Provincial GDP           | 0.261***             | 0.263***  | 0.250***  | 0.254***  | 0.254***  |
|                          | (-0.035)             | (-0.035)  | (-0.035)  | (-0.034)  | (-0.034)  |
| Constant                 | -9.828***            | -9.888*** | -9.642*** | -9.713*** | -9.638*** |
|                          | (-0.947)             | (-0.948)  | (-0.947)  | (-0.945)  | (-0.946)  |
| Year                     | Yes                  | Yes       | Yes       | Yes       | Yes       |
| Area                     | Yes                  | Yes       | Yes       | Yes       | Yes       |
| Observations             | 12684                | 12684     | 12684     | 12684     | 12684     |
| Pseudo R <sup>2</sup>    | 0.079                | 0.079     | 0.085     | 0.085     | 0.083     |

Note: Model 2 tests the relationship between CEOs with government work experience and enterprise investment in pollution control. Models 3 to 5 test the moderating effect of CEOs' status perception.

\*, \*\*, \*\*\* indicate statistical significance at the 10%, 5%, and 1% level, respectively.

<http://doi.org/10.1371/journal.pone.0317903.t003>

<https://doi.org/10.1371/journal.pone.0317903.t003>

in Table 5 show that the IMR is insignificant, indicating no endogeneity problem caused by sample deviation. Furthermore, the correlation coefficients of the main and moderating effects are still significant at the 5% level. Thus, we assume that H1 to H2c can still be verified.

## 6. Discussion

This study draws on imprinting theory and status perception to explore the impact of CEOs with government work experience on enterprise investment in pollution control. Furthermore,

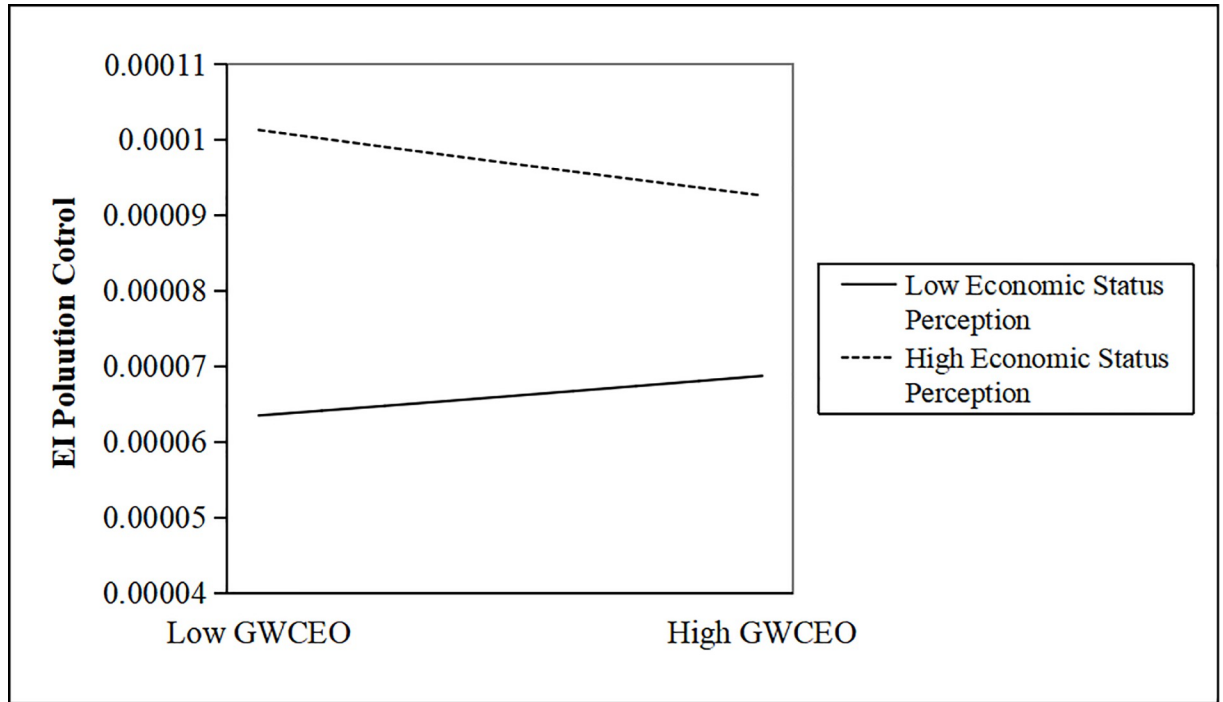

Fig 1. The moderating effect of a CEO's economic status perception. <http://doi.org/10.1371/journal.pone.0317903.g001>.

<https://doi.org/10.1371/journal.pone.0317903.g001>

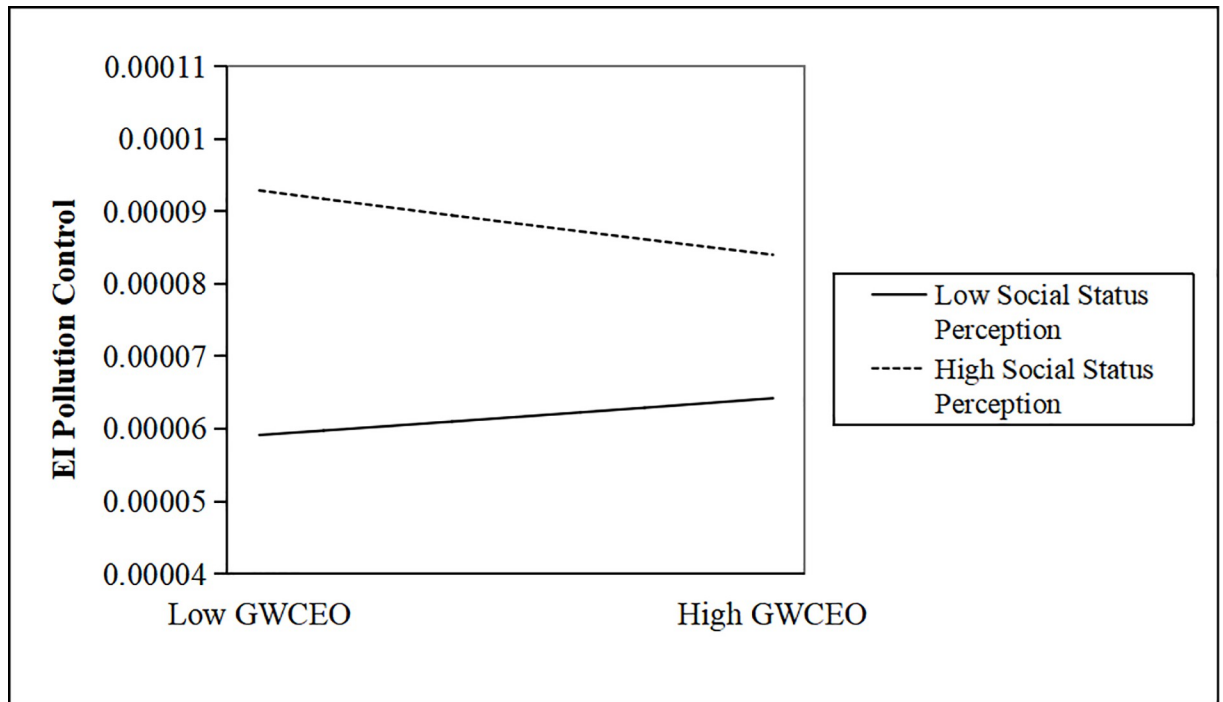

Fig 2. The moderating effect of a CEO's social status perception. <http://doi.org/10.1371/journal.pone.0317903.g002>.

<https://doi.org/10.1371/journal.pone.0317903.g002>

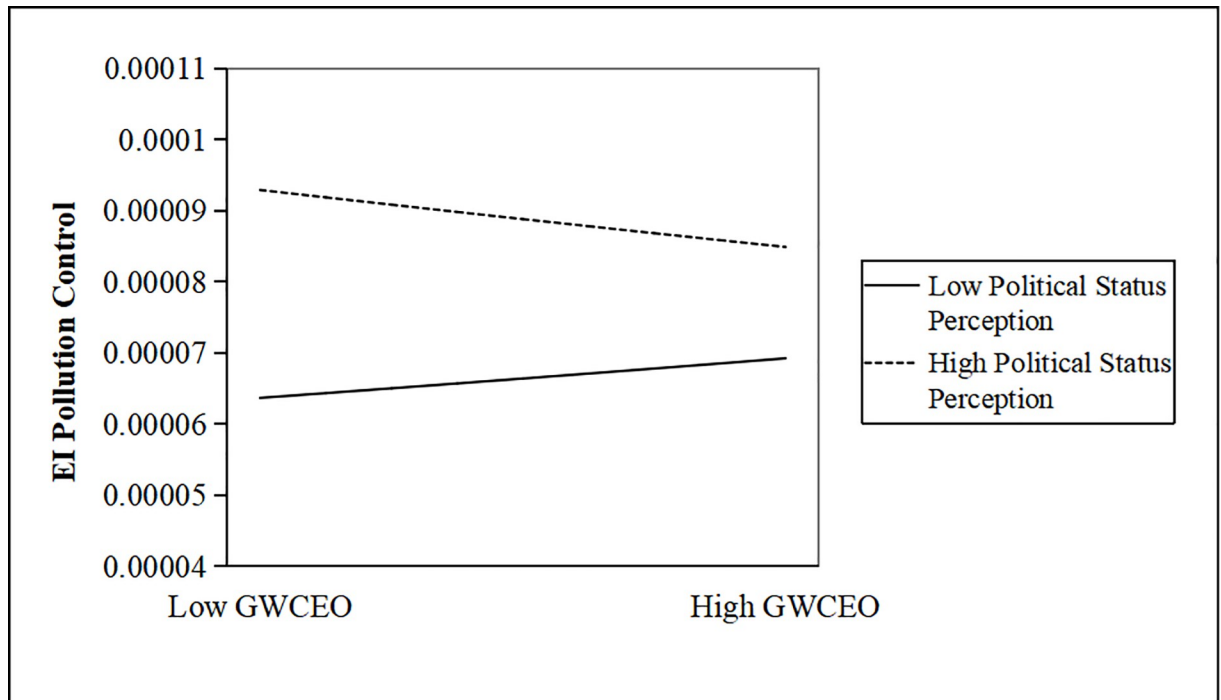

**Fig 3. The moderating effect of a CEO's political status perception.** <http://doi.org/10.1371/journal.pone.0317903.g003>.

<https://doi.org/10.1371/journal.pone.0317903.g003>

it examines the moderating role of status perception. Based on data from Chinese private enterprises from 2008 to 2014, this study reached the following conclusions:

First, CEOs with government work experience have been proven to promote enterprise investment in pollution control. Previous research indicates that CEOs' professional experience plays a significant role in enterprise development [33, 34], and this study aligns with that view. Gao et al. [33] found that CEOs' financial experience hinders enterprise innovation, while Abecassis-Moedas et al. [34] suggested that CEOs' entrepreneurial experience can influence an enterprise's growth strategy. Unlike these two studies, which approach from an economic perspective, this study investigates the impact of CEOs' non-commercial experience on enterprise development from an environmental perspective. The results show that CEOs with government work experience impart characteristics of government imprinting to their cognition and decision-making, thereby promoting enterprise investment in pollution control.

Second, economic, social, and political status perception negatively moderates the positive relationship between CEOs with government work experience and enterprise investment in pollution control. Although some scholars have found a positive relationship between status perception and enterprise environmental governance [27, 67], recent evidence suggests that the impact of status perception on enterprise environmental governance may be ambiguous [26, 97]. One limitation of these studies is their undifferentiated approach to status perception. Consistent with Weber [24], this study divides status perception into three dimensions to investigate and thoroughly reveal its impact on enterprise environmental governance. Accordingly, this study focuses on the weakening effects of three types of status perception on CEOs' government imprinting. The results indicate that economic status perception weakens government imprinting through cognition and structure, social status perception weakens government imprinting through cognition and culture, and political status perception weakens government imprinting through resources and strategy.

Table 4. Probit regression results.

| Variables                | EI Pollution Control |           |           |           |           |
|--------------------------|----------------------|-----------|-----------|-----------|-----------|
|                          | Model 1              | Model 2   | Model 3   | Model 4   | Model 5   |
| GWCEO                    |                      | 0.063*    | 0.064**   | 0.067**   | 0.067**   |
|                          |                      | (0.033)   | (0.033)   | (0.033)   | (0.033)   |
| GWCEO*ES Perception      |                      |           | -0.142**  |           |           |
|                          |                      |           | (0.068)   |           |           |
| GWCEO*SS Perception      |                      |           |           | -0.156**  |           |
|                          |                      |           |           | (0.068)   |           |
| GWCEO*PS Perception      |                      |           |           |           | -0.145**  |
|                          |                      |           |           |           | (0.065)   |
| ES Perception            |                      |           | 0.254***  |           |           |
|                          |                      |           | (0.025)   |           |           |
| SS Perception            |                      |           |           | 0.242***  |           |
|                          |                      |           |           | (0.025)   |           |
| PS Perception            |                      |           |           |           | 0.201***  |
|                          |                      |           |           |           | (0.025)   |
| CEO Sex                  | 0.201***             | 0.201***  | 0.188***  | 0.188***  | 0.191***  |
|                          | (0.035)              | (0.035)   | (0.035)   | (0.035)   | (0.035)   |
| CEO Age                  | 0.004**              | 0.003**   | 0.003*    | 0.003*    | 0.003     |
|                          | (0.002)              | (0.002)   | (0.002)   | (0.002)   | (0.002)   |
| CEO Political Connection | 0.458***             | 0.455***  | 0.414***  | 0.405***  | 0.393***  |
|                          | (0.032)              | (0.032)   | (0.032)   | (0.032)   | (0.033)   |
| Enterprise Age           | 0.019***             | 0.019***  | 0.018***  | 0.018***  | 0.018***  |
|                          | (0.002)              | (0.002)   | (0.002)   | (0.002)   | (0.002)   |
| Enterprise industry      | 0.562***             | 0.564***  | 0.555***  | 0.556***  | 0.558***  |
|                          | (0.025)              | (0.025)   | (0.025)   | (0.025)   | (0.025)   |
| Provincial GDP           | 0.150***             | 0.151***  | 0.143***  | 0.145***  | 0.146***  |
|                          | (0.020)              | (0.020)   | (0.020)   | (0.020)   | (0.020)   |
| Constant                 | -5.743***            | -5.778*** | -5.623*** | -5.664*** | -5.628*** |
|                          | (0.551)              | (0.551)   | (0.551)   | (0.550)   | (0.551)   |
| Year                     | Yes                  | Yes       | Yes       | Yes       | Yes       |
| Area                     | Yes                  | Yes       | Yes       | Yes       | Yes       |
| Observations             | 12684                | 1268      | 12684     | 12684     | 12684     |
| Pseudo R <sup>2</sup>    | 0.079                | 0.079     | 0.086     | 0.085     | 0.083     |

Note

\*, \*\*, \*\*\* indicate statistical significance at the 10%, 5%, and 1% level, respectively.

<http://doi.org/10.1371/journal.pone.0317903.t004>

<https://doi.org/10.1371/journal.pone.0317903.t004>

## 6.1 Theoretical contributions

Our study offers three main contributions. First, it explores the impact of CEOs with government work experience on enterprise investment in pollution control. This enriches the research on non-commercial experience career imprints and expands the application of imprinting theory in environmental governance. Marquis [20] posits that career imprints emphasize that early career experiences not only shape individual characteristics and behaviors but also influence their decision-making patterns and values in the long term. This process is significant during critical periods of career development when individuals selectively absorb characteristics, behaviors, and cognitive frameworks that reflect their imprints [19, 38].

**Table 5. Results of the Heckman two-stage procedure.**

| Panel A: The first-step regression model employed to estimate inverse mills |                       |                       |                          |                       |                       |      |              |
|-----------------------------------------------------------------------------|-----------------------|-----------------------|--------------------------|-----------------------|-----------------------|------|--------------|
|                                                                             | CEO Sex               | CEO Age               | CEO Political Connection | Cons                  | Year                  | Area | Observations |
| CEO Edu                                                                     | -0.305*** (0.033)     | -0.138*** (0.001)     | 0.351*** (0.031)         | -0.017*** (0.092)     | Yes                   | Yes  | 12684        |
| Panel B: The second-step regression after introducing inverse mills         |                       |                       |                          |                       |                       |      |              |
| Variables                                                                   | EI Pollution Control  |                       |                          |                       |                       |      |              |
|                                                                             | Model 1               | Model 2               | Model 3                  | Model 4               | Model 5               |      |              |
| GWCEO                                                                       |                       | 0.107**<br>(0.054)    | 0.110**<br>(0.054)       | 0.114**<br>(0.054)    | 0.116**<br>(0.054)    |      |              |
| GWCEO*ES Perception                                                         |                       |                       | -0.234**<br>(0.112)      |                       |                       |      |              |
| GWCEO*SS Perception                                                         |                       |                       |                          | -0.252**<br>(0.112)   |                       |      |              |
| GWCEO*PS Perception                                                         |                       |                       |                          |                       | -0.240**<br>(0.106)   |      |              |
| ES Perception                                                               |                       |                       | 0.420***<br>(0.042)      |                       |                       |      |              |
| SS Perception                                                               |                       |                       |                          | 0.399***<br>(0.042)   |                       |      |              |
| PS Perception                                                               |                       |                       |                          |                       | 0.327***<br>(0.041)   |      |              |
| CEO Sex                                                                     | 0.301***<br>(0.069)   | 0.301***<br>(0.069)   | 0.272***<br>(0.069)      | 0.282***<br>(0.069)   | 0.288***<br>(0.069)   |      |              |
| CEO Age                                                                     | -0.008<br>(0.017)     | -0.009<br>(0.017)     | -0.013<br>(0.017)        | -0.010<br>(0.017)     | -0.009<br>(0.017)     |      |              |
| CEO Political Connection                                                    | 1.081***<br>(0.392)   | 1.081***<br>(0.392)   | 1.082***<br>(0.394)      | 0.994**<br>(0.392)    | 0.946**<br>(0.393)    |      |              |
| Enterprise Age                                                              | 0.032***<br>(0.004)   | 0.032***<br>(0.004)   | 0.029***<br>(0.004)      | 0.029***<br>(0.004)   | 0.029***<br>(0.004)   |      |              |
| Enterprise industry                                                         | 0.928***<br>(0.041)   | 0.931***<br>(0.041)   | 0.915***<br>(0.041)      | 0.918***<br>(0.041)   | 0.921***<br>(0.041)   |      |              |
| Provincial GDP                                                              | 0.261***<br>(0.035)   | 0.263***<br>(0.035)   | 0.251***<br>(0.035)      | 0.254***<br>(0.034)   | 0.255***<br>(0.034)   |      |              |
| IMR                                                                         | 1.758<br>(2.092)      | 1.789<br>(2.094)      | 2.143<br>(2.106)         | 1.763<br>(2.091)      | 1.605<br>(2.099)      |      |              |
| Constant                                                                    | -11.286***<br>(1.987) | -11.373***<br>(1.989) | -11.420***<br>(1.997)    | -11.177***<br>(1.985) | -10.970***<br>(1.993) |      |              |
| Year                                                                        | Yes                   | Yes                   | Yes                      | Yes                   | Yes                   |      |              |
| Area                                                                        | Yes                   | Yes                   | Yes                      | Yes                   | Yes                   |      |              |
| Observations                                                                | 12684                 | 1268                  | 12684                    | 12684                 | 12684                 |      |              |
| Pseudo R <sup>2</sup>                                                       | 0.079                 | 0.079                 | 0.085                    | 0.085                 | 0.083                 |      |              |

Note  
 \*, \*\*, \*\*\* indicate statistical significance at the 10%, 5%, and 1% level, respectively.

<http://doi.org/10.1371/journal.pone.0317903.t005>

<https://doi.org/10.1371/journal.pone.0317903.t005>

Currently, most studies on career imprints and enterprise development focus primarily on individuals' commercial experiences, such as financial experience [33], digital technology experience [98], and marketing experience [2]. However, as more CEOs transition from

government sectors to the enterprise realm, the impact of their non-commercial experiences on enterprise development becomes more apparent. The knowledge, skills, and values accumulated during their government tenure influence their decision-making approaches and shape their perceptions and responsibilities regarding enterprise social responsibility [42, 99]. Nevertheless, research on non-commercial experience career imprints remains insufficient. Most literature must adequately explore how government work experience shapes CEOs' decision-making behaviors and how these behaviors affect enterprise investment in pollution control [4, 11]. Therefore, this study defines the decision-making behaviors formed by individual government work experience as "government imprinting," focusing on how government imprinting influences CEOs' decisions regarding enterprise investment in pollution control. This perspective expands the research on non-commercial experience career imprints and provides new opportunities for the further development and application of imprinting theory in environmental governance.

Second, our study contributes significantly to the literature on status perception by delineating its dimensions and exploring how they influence the relationship between CEOs with government work experience and enterprise investment in pollution control. Previous research has focused on the impact of status perception on enterprise development. For instance, Sheng et al. [91] examine the effect of CEOs' subjective status perception on international behaviors, while Li et al. [67] investigate the influence of CEOs' self-perceived status on enterprise social responsibility. However, the lack of dimensional differentiation has limited further in-depth research in status perception [30], resulting in insufficient theoretical guidance for enterprises [29]. Existing research has indicated that various dimensions of status perception can affect CEOs' decision-making styles. For instance, CEOs with high economic status perception are more likely to focus on short-term financial performance [25], while those with high social status perception emphasize enterprise social reputation [26]. Therefore, this study categorizes status perception into three dimensions: economic, social, and political, and further explores the moderating effects of each dimension on the relationship between CEOs with government work experience and enterprise investment in pollution control. This study enriches the conceptual connotation and practical application of status perception, provides essential references for enterprises to flexibly utilize status perception in different contexts, and lays the foundation for subsequent research on the complex mechanisms of status perception in enterprise development.

Third, this study explores the impact of CEOs with government work experience on enterprise investment in pollution control from a micro-level perspective, making a significant contribution to the literature on sustainable development. Previous research has primarily focused on macro- and meso-level factors [100, 101], such as environmental legislation [88], environmental regulation [102], digital transformation [103], enterprise social responsibility [104], product innovation [105], and organizational culture. However, as leaders of enterprises, CEOs' personal experiences, values, and decision-making styles significantly influence the decision-making and execution effectiveness of enterprise environmental investment, thereby influencing sustainable development [1, 3, 52]. Currently, research on the impact of CEOs on enterprise environmental governance primarily concentrates on two aspects: one is the innate traits of CEOs, such as gender [5], age [6], and overconfidence [7]; and the other is their acquired experiences, including marketing [2], finance, and overseas experiences [106]. Environmental behaviors driven by these acquired experiences are typically oriented toward serving enterprise interests, manifested as externally motivated actions. Conversely, CEOs with government work experience can foster a sense of social responsibility and mission for environmental protection [17, 18], both cognitively and structurally. This intrinsic sense of responsibility is more likely to influence long-term enterprise environmental governance behaviors,

thus promoting sustainable development [4, 50], which warrants deeper investigation. Additionally, this study responds to the call by Mahran and Elamer [4] regarding how CEO experience affects environmental sustainability practices and outcomes. The recent controversies surrounding Japan's nuclear wastewater discharge have sparked global discussions, prompting academia and practice to emphasize the significance of pollution control investment in sustainable development. Therefore, this study focuses on the impact of CEOs with government work experience on enterprise investment in pollution control at the micro level. Such experiences instill a spontaneous sense of responsibility in CEOs, motivating them to strive for sustainable development and providing new perspectives and insights for research in this area.

## 6.2 Practical implications

First, enterprises can hire CEOs with previous government work experience to help them respond to government requirements for environmental protection. Our findings indicate that CEOs with government work experience can promote enterprise investment in pollution control. These CEOs, who have previously worked in government departments, can interpret government environmental policies and dynamics more thoroughly and possess richer experience in environmental pollution control [3, 49]. Therefore, enterprises should explicitly recruit CEOs with government work experience and encourage them to engage in exchanges with diverse partners, actively participate in internal and external strategic development training, and fully leverage their advantages in past government work experience while addressing any shortcomings in enterprise management experience.

Second, enterprises must understand how the CEO's status perception influences decision-making, primarily regarding environmental investments. Research indicates that economic, social, and political status perceptions negatively moderate the relationship between CEOs with government work experience and enterprise investment in pollution control. Therefore, enterprises should conduct regular surveys and foster communication to gain deeper insights into CEOs' status perception preferences and develop strategies to encourage more proactive environmental investment decisions [107]. For instance, concerning economic status perception, enterprises could implement economic incentive policies linked to the performance of environmental investments, such as bonuses and other financial rewards, to motivate CEOs to prioritize environmental projects [4]. These incentive measures can help alleviate the short-term focus of high-status CEOs in resource allocation, guiding them toward more long-term investments in pollution control.

Third, enterprises can establish a continuous feedback mechanism to understand the CEO's understanding and attitude toward environmental policies and dynamics and adjust the enterprise's pollution control investment strategy based on the feedback results. Research findings indicate that all three types of CEO status perception can influence enterprise investment in pollution control. Therefore, enterprises can establish regular CEO environmental policy seminars or working groups, allowing CEOs to discuss environmental policies and dynamics with diverse partners such as environmental experts and government officials. This regular discussion mechanism can promote CEOs' attention and reflection on environmental issues, identify problems, and propose solutions promptly, driving continuous progress in the enterprise's environmental efforts.

## 6.3 Limitations and future research

First, future research can expand the study of imprinting theory in terms of research subjects and contexts. This study primarily focuses on how the decision-making patterns of CEOs, as part of the management, create government imprinting effects on enterprise investment in

pollution control. However, an enterprise is composed not only of its management but also of its employees. As essential executors, employees are decisive in implementing enterprise investment in pollution control [108]. Therefore, future scholars should pay more attention to studying the imprinting effects generated by the group decision-making patterns of enterprise employees on pollution control investments [19]. Additionally, this study does not consider the impact of the macro-external environment on enterprise investment in pollution control. With the advent of new-generation information technology, the iteration of various production factors within enterprises is accelerating. How the continuous influence of CEO imprinting affects pollution control investment decisions will unfold in the face of dynamic changes in digital technology is a new issue worth paying attention to in the digital era [103, 109].

Second, future research can employ diverse data and various research methods to delve into the dynamic process of imprinting effects. This study uses mixed cross-sectional data for empirical research, focusing primarily on the moderating role of CEOs' status perception on government imprinting. Future research could utilize dynamic panel data to capture the long-term impact paths of CEO government imprinting on enterprise investment in pollution control at different time points [9]. Additionally, future studies could consider adopting qualitative research methods, such as case studies [110], to investigate how CEO government imprinting affects enterprise investment in pollution control decisions and outcomes. Applying these diverse data and research methods will help to more comprehensively understand the application of imprinting theory in enterprise environmental decision-making, thereby providing theoretical and practical guidance for enterprises to make effective decisions in a dynamic environment.

## Author Contributions

**Conceptualization:** Mixiang Peng.

**Data curation:** Dayuan Li.

**Funding acquisition:** Dayuan Li.

**Investigation:** Mixiang Peng.

**Methodology:** Mixiang Peng, Chaolin Zhang.

**Project administration:** Dayuan Li.

**Software:** Mixiang Peng, Chaolin Zhang.

**Supervision:** Dayuan Li.

**Validation:** Mixiang Peng, Chaolin Zhang.

**Writing – original draft:** Mixiang Peng.

**Writing – review & editing:** Mixiang Peng, Dayuan Li, Chaolin Zhang.

## References

1. Du L, Ren S. CEO poverty experience and corporate environmental violations. *Bus Strateg Environ*. 2024; 33(3):1853–64. <https://doi.org/10.1002/bse.3581>
2. Huang H, Chang Y, Zhang L. CEO's marketing experience and firm green innovation. *Bus Strateg Environ*. 2023; 32(8):5211–33. <https://doi.org/10.1002/bse.3413>
3. Li X, Guo F, Wang J. A path towards enterprise environmental performance improvement: How does CEO green experience matter? *Bus Strateg Environ*. 2024; 33(2):820–38. <https://doi.org/10.1002/bse.3524>

4. Mahran K, Elamer AA. Chief Executive Officer (CEO) and corporate environmental sustainability: A systematic literature review and avenues for future research. *Bus Strateg Environ*. 2024; 33(3):1977–2003. <https://doi.org/10.1002/bse.3577>
5. Landry EE, Bernardi RA, Bosco SM. Recognition for sustained corporate social responsibility: Female directors make a difference. *Corp Soc Resp Env Ma*. 2016; 23(1):27–36. <https://doi.org/10.1002/csr.1358>
6. Lewis BW, Walls JL, Dowell GW. Difference in degrees: CEO characteristics and firm environmental disclosure. *Strategic Manage J*. 2014; 35(5):712–22. <https://doi.org/10.1002/smj.2127>
7. Zhang L, Li D, Xiao Z, Jiang J, Lu F. Does overconfident CEO lead to corporate environmental misconducts? Evidence from China. *Plos One*. 2024; 19(9):e0309957. <https://doi.org/10.1371/journal.pone.0309957>
8. Ezzi F, Azouzi MA, Jarbouai A. Does CEO emotional intelligence affect the performance of the diversifiable companies? *Cogent Econ Financ*. 2016; 4(1):1230958. <https://doi.org/10.1080/23322039.2016.1230958>
9. Li D, Jiang J, Zhang L, Huang C, Wang D. Do CEOs with sent-down movement experience foster corporate environmental responsibility? *J Bus Ethics*. 2023; 185(1):147–68. <https://doi.org/10.1007/s10551-022-05300-0>
10. Haojun W, Jiazhu L. Professional experience of CEOs in industry associations and corporate green innovation—empirical evidence from China. *Pac-basin Financ J*. 2024; 85:102383. <https://doi.org/10.1016/j.pacfin.2024.102383>
11. Osei Bonsu C, Liu C, Yawson A. The impact of CEO attributes on corporate decision-making and outcomes: A review and an agenda for future research. *Int J Manag Financ*. 2024; 20(2):503–45. <https://doi.org/10.1108/JMF-02-2023-0092>
12. Shahab Y, Ntim CG, Chen Y, Ullah F, Li HX, Ye Z. Chief executive officer attributes, sustainable performance, environmental performance, and environmental reporting: New insights from upper echelons perspective. *Bus Strateg Environ*. 2020; 29(1):1–16. <https://doi.org/10.1002/bse.2345>
13. Al-Shaer H, Zaman M. CEO compensation and sustainability reporting assurance: Evidence from the UK. *J Bus Ethics*. 2019; 158:233–52. <https://doi.org/10.1007/s10551-017-3735-8>
14. Figge F, Hahn T. Is green and profitable sustainable? Assessing the trade-off between economic and environmental aspects. *Int J Prod Econ*. 2012; 140(1):92–102. <https://doi.org/10.1016/j.ijpe.2012.02.001>
15. Zhang Z, Zhang B, Jia M. The military imprint: The effect of executives' military experience on firm pollution and environmental innovation. *Leadership Quart*. 2022; 33(2):101562. <https://doi.org/10.1016/j.leaqua.2021.101562>
16. Al-Shaer H, Albitar K, Liu J. CEO power and CSR-linked compensation for corporate environmental responsibility: UK evidence. *Rev Quant Financ Acc*. 2023; 60(3):1025–63. <https://doi.org/10.1007/s11156-022-01118-z>
17. Huang Z, Liao G, Li Z. Loaning scale and government subsidy for promoting green innovation. *Technol Forecast Soc*. 2019; 144:148–56. <https://doi.org/10.1016/j.techfore.2019.04.023>
18. Liu N, Liu Y, Yu X. The impact of public environmental concern on environmental pollution: The moderating effect of government environmental regulation. *Plos One*. 2023; 18(8). <https://doi.org/10.1371/journal.pone.0290255> PMID: 37590242
19. Simsek Z, Fox BC, Heavey C. “What’s past is prologue” A framework, review, and future directions for organizational research on imprinting. *J Manage*. 2015; 41(1):288–317. <https://doi.org/10.1177/0149206314553276>
20. Marquis C, Tilcsik A. Imprinting: Toward a multilevel theory. *Acad Manag Ann*. 2013; 7(1):195–245. <https://doi.org/10.1080/19416520.2013.766076>
21. Wesley CL, Martin GW, Rice DB, Lubojacky CJ. Do the right thing: The imprinting of deonance at the upper echelons. *J Bus Ethics*. 2022; 180(1):187–213. <https://doi.org/10.1007/s10551-021-04903-3>
22. Chen L, Yang Z. Is the past really gone? How CEOs' socialist imprinting affects corporate green innovation in China. *Technol Anal Strateg*. 2024; 1–16. <https://doi.org/10.1080/09537325.2024.2330550>
23. Zhu L, Zhao J. Entrepreneurs' self-perceived social status and firms' philanthropy: Evidence from Chinese private firms. *Asia Pac Bus Rev*. 2023; 29(3):588–612. <https://doi.org/10.1080/13602381.2021.1978235>
24. Weber M. The theory of social and economic organization: Simon and Schuster; 2009.
25. Martin GP, Wiseman RM, Gomez-Mejia LR. Going short-term or long-term? CEO stock options and temporal orientation in the presence of slack. *Strategic Manage J*. 2016; 37(12):2463–80. <https://doi.org/10.1002/smj.2445>

26. Liu Y, Dai W, Liao M, Wei J. Social status and corporate social responsibility: Evidence from Chinese privately owned firms. *J Bus Ethics*. 2021; 169:651–72. <https://doi.org/10.1007/s10551-020-04547-9>
27. Niu Z, Zhou X, Pei H. Social determinants of sustainability: The imprinting effect of social class background on corporate environmental responsibility. *Corp Soc Resp Env Ma*. 2020; 27(6):2849–66. <https://doi.org/10.1002/csr.2007>
28. Dai W, Si S. Government policies and firms' entrepreneurial orientation: Strategic choice and institutional perspectives. *J Bus Res*. 2018; 93:23–36. <https://doi.org/10.1016/j.jbusres.2018.08.026>
29. Niu Z, Zhou X, Pei H. Effect of perceived status of entrepreneur on firm's CSR behavior: Evidence from Chinese private enterprises survey. *Financ Res Lett*. 2021; 39:101561. <https://doi.org/10.1016/j.frl.2020.101561>
30. Bitektine A, Hill K, Song F, Vandenberghe C. Organizational legitimacy, reputation, and status: Insights from micro-level measurement. *Acad Manag Discov*. 2020; 6(1):107–36. <https://doi.org/10.5465/amd.2017.0007>
31. Stinchcombe A. Organization-creating organizations. *Trans-action*. 1965; 2(2):34–5.
32. Wies S, Moorman C, Chandy RK. Innovation imprinting: Why some firms beat the post-IPO innovation slump. *J Marketing*. 2023; 87(2):232–52. <https://doi.org/10.1177/00222429221114317>
33. Gao Y, Tang Y, Zhang J. CEO financial background, managerial ownership, and corporate innovation: Insights from imprinting theory. *Front Psychol*. 2023; 14:1126853. <https://doi.org/10.3389/fpsyg.2023.1126853> PMID: 36865362
34. Abecassis-Moedas C, BenMahmoud-Jouini S, Manceau D, Pereira J. Imprinting of founders' entrepreneurial motivations on enterprises' practices and processes: The context of creative industries. *Creat Innov Manag*. 2021; 30(1):182–97. <https://doi.org/10.1111/caim.12421>
35. Christensen T, Fimreite AL, Læg Reid P. Crisis management: The perceptions of citizens and civil servants in Norway. *Admin Soc*. 2011; 43(5):561–94. <https://doi.org/10.1177/0095399711412914>
36. Kruyen PM, Van Genugten M. Opening up the black box of civil servants' competencies. *Public Manag Rev*. 2020; 22(1):118–40. <https://doi.org/10.1080/14719037.2019.1638442>
37. Xu H, Meng M, Zhu F, Ding Q. The role of local officials in promoting public participation during local urban planning processes: Evidence from Chinese cities. *Land Use Policy*. 2024; 141:107108. <https://doi.org/10.1016/j.landusepol.2024.107108>
38. Higgins MC. *Career imprints: Creating leaders across an industry*: John Wiley & Sons; 2005.
39. Xie L, Yang L. The influence of perceptions of promotion opportunities on job performance and its mechanisms: A case study of Chinese junior civil servants. *J Contemp China*. 2021; 30(127):118–35. <https://doi.org/10.1080/10670564.2020.1766913>
40. Mériade L, Qiang LY. Public values on the public/private boundary: The case of civil servant recruitment examinations in China. *Int Rev Adm Sci*. 2015; 81(2):282–302. <https://doi.org/10.1177/0020852314546581>
41. Fisman R, Shi J, Wang Y, Wu W. Social ties and the selection of China's political elite. *Am Econ Rev*. 2020; 110(6):1752–81. <https://doi.org/10.1257/aer.20180841>
42. Lee C, Jeon D, Kim W, Lee J. Evaluating training for new government officials: A case study using the success case method. *Public Pers Manage*. 2017; 46(4):419–44. <https://doi.org/10.1177/0091026017730382>
43. Tian G, Tsai W-H. Ideological education and practical training at a county party school: Shaping local governance in contemporary China. *China J*. 2021; 85(1):1–25.
44. van der Meer J, Vermeeren B, Steijn B. Wellbeing during a crisis: A longitudinal study of local government civil servants. *Rev Public Pers Adm*. 2024; 44(1):32–59. <https://doi.org/10.1177/0734371X221084104>
45. Christensen T, Læg Reid P. Balancing governance capacity and legitimacy: How the Norwegian government handled the COVID-19 crisis as a high performer. *Public Admin Rev*. 2020; 80(5):774–9. <https://doi.org/10.1111/puar.13241> PMID: 32836445
46. Rao HR, Vemprala N, Akello P, Valecha R. Retweets of officials' alarming vs reassuring messages during the COVID-19 pandemic: Implications for crisis management. *Int J Inform Manage*. 2020; 55:102187. <https://doi.org/10.1016/j.ijinfomgt.2020.102187> PMID: 32836644
47. Harrison JS, Thurgood GR, Boivie S, Pfarrer MD. Perception is reality: How CEOs' observed personality influences market perceptions of firm risk and shareholder returns. *Acad Manage J*. 2020; 63(4):1166–95. <https://doi.org/10.5465/amj.2018.0626>
48. Hossain A, Saadi S, Amin AS. Does CEO risk-aversion affect carbon emission? *J Bus Ethics*. 2023; 182(4):1171–98. <https://doi.org/10.1007/s10551-021-05031-8>

49. Haque F, Ntim CG. Environmental policy, sustainable development, governance mechanisms and environmental performance. *Bus Strateg Environ*. 2018; 27(3):415–35. <https://doi.org/10.1002/bse.2007>
50. Morrison TH, Adger WN, Brown K, Lemos MC, Huitema D, Phelps J, et al. The black box of power in polycentric environmental governance. *Global Environ Chang*. 2019; 57:101934. <https://doi.org/10.1016/j.gloenvcha.2019.101934>
51. Huang M, Li M, Liao Z. Do politically connected CEOs promote Chinese listed industrial firms' green innovation? The mediating role of external governance environments. *J Clean Prod*. 2021; 278:123634. <https://doi.org/10.1016/j.jclepro.2020.123634>
52. Boone C, Buyl T, Declerck CH, Sajko M. A neuroscience-based model of why and when CEO social values affect investments in corporate social responsibility. *Leadership Quart*. 2022; 33(3):101386. <https://doi.org/10.1016/j.leaqua.2020.101386>
53. Wernicke G, Sajko M, Boone C. How much influence do CEOs have on company actions and outcomes? The example of corporate social responsibility. *Acad Manag Discov*. 2022; 8(1):36–55. <https://doi.org/10.5465/amd.2019.0074>
54. Kraus S, Rehman SU, Garcia FJS. Corporate social responsibility and environmental performance: The mediating role of environmental strategy and green innovation. *Technol Forecast Soc*. 2020; 160:120262. <https://doi.org/10.1016/j.techfore.2020.120262>
55. Fukuda K, Ouchida Y. Corporate social responsibility (CSR) and the environment: Does CSR increase emissions? *Energ Econ*. 2020; 92:104933. <https://doi.org/10.1016/j.eneco.2020.104933>
56. Branicki L, Brammer S, Pullen A, Rhodes C. The morality of “new” CEO activism. *J Bus Ethics*. 2021; 170:269–85. <https://doi.org/10.1007/s10551-020-04656-5>
57. Lee DS, Chung KH, Rhee I. Who becomes a civil servant? Evidence from a decade of youth panel analysis. *Public Manag Rev*. 2024;1–24. <https://doi.org/10.1080/14719037.2024.2327616>
58. Göx RF, Hemmer T. On the relation between managerial power and CEO pay. *J Account Econ*. 2020; 69(2–3):101300. <https://doi.org/10.1016/j.jacceco.2020.101300>
59. De Angelis D, Grinstein Y. Relative performance evaluation in CEO compensation: A talent-retention explanation. *J Financ Quant Anal*. 2020; 55(7):2099–123. <https://doi.org/10.1017/S0022109019000504>
60. Wu Q, Yan D, Umair M. Assessing the role of competitive intelligence and practices of dynamic capabilities in business accommodation of SMEs. *Econ Anal Policy*. 2023; 77:1103–14. <https://doi.org/10.1016/j.eap.2022.11.024>
61. Kiss AN, Cortes AF, Herrmann P. CEO proactiveness, innovation, and firm performance. *Leadership Quart*. 2022; 33(3):101545. <https://doi.org/10.1016/j.leaqua.2021.101545>
62. Farza K, Ftiti Z, Hlioui Z, Louhichi W, Omri A. Does it pay to go green? The environmental innovation effect on corporate financial performance. *J Environ Manage*. 2021; 300:113695. <https://doi.org/10.1016/j.jenvman.2021.113695> PMID: 34649325
63. Ali R, Rehman RU, Suleman S, Ntim CG. CEO attributes, investment decisions, and firm performance: New insights from upper echelons theory. *Manag Decis Econ*. 2022; 43(2):398–417. <https://doi.org/10.1002/mde.3389>
64. Zhong Q, Wen H, Lee C-C. How does economic growth target affect corporate environmental investment? Evidence from heavy-polluting industries in China. *Environ Impact Asses*. 2022; 95:106799. <https://doi.org/10.1016/j.eiar.2022.106799>
65. Wang R, Wijen F, Heugens PP. Government's green grip: Multifaceted state influence on corporate environmental actions in China. *Strategic Manage J*. 2018; 39(2):403–28. <https://doi.org/10.1002/smj.2714>
66. Zhang D, Du W, Zhuge L, Tong Z, Freeman RB. Do financial constraints curb firms' efforts to control pollution? Evidence from Chinese manufacturing firms. *J Clean Prod*. 2019; 215:1052–8. <https://doi.org/10.1016/j.jclepro.2019.01.112>
67. Li J, Mao K, Lu P. Doing good, feeling good? Corporate social responsibility and CEOs' self-perceived status. *Asia Pac J Manag*. 2023;1–25. <https://doi.org/10.1007/s10490-023-09914-4>
68. Cai W, Ye P. How does environmental regulation influence enterprises' total factor productivity? A quasi-natural experiment based on China's new environmental protection law. *J Clean Prod*. 2020; 276:124105. <https://doi.org/10.1016/j.jclepro.2020.124105>
69. Su J, Jiang J, Zhang B, Cao L. Industry salary gap incentive and enterprise innovation. *J Asian Econ*. 2023; 87:101633. <https://doi.org/10.1016/j.asieco.2023.101633>
70. Wang JJ, Lalwani AK. The distinct influence of power distance perception and power distance values on customer satisfaction in response to loyalty programs. *Int J Res Mark*. 2019; 36(4):580–96. <https://doi.org/10.1016/j.ijresmar.2018.11.006>

71. Zhou J, Ye S, Liu X. More social, more socially responsible? The impact of CEO social media use on corporate social performance. *Brit J Manage*. 2024; 35(3):1592–608. <https://doi.org/10.1111/1467-8551.12774>
72. Asmussen CG, Fosfuri A. Orchestrating corporate social responsibility in the multinational enterprise. *Strategic Manage J*. 2019; 40(6):894–916. <https://doi.org/10.1002/smj.3007>
73. Kish-Gephart JJ, Campbell JT. You don't forget your roots: The influence of CEO social class background on strategic risk taking. *Acad Manage J*. 2015; 58(6):1614–36. <https://doi.org/10.5465/amj.2013.1204>
74. Gustafsson B, Yang X, Shuge G, Jianzhong D. Charitable donations by China's private enterprises. *Econ Syst*. 2017; 41(3):456–69. <https://doi.org/10.1016/j.ecosys.2016.10.007>
75. Kim H, Woo E, Uysal M, Kwon N. The effects of corporate social responsibility (CSR) on employee well-being in the hospitality industry. *Int J Contemp Hosp M*. 2018; 30(3):1584–600. <https://doi.org/10.1108/IJCHM-03-2016-0166>
76. Yang L, Qin H, Xia W, Gan Q, Li L, Su J, et al. Resource slack, environmental management maturity and enterprise environmental protection investment: An enterprise life cycle adjustment perspective. *J Clean Prod*. 2021; 309:127339. <https://doi.org/10.1016/j.jclepro.2021.127339>
77. Kacperczyk AJ. Social influence and entrepreneurship: The effect of university peers on entrepreneurial entry. *Organ Sci*. 2013; 24(3):664–83. <https://doi.org/10.1287/orsc.1120.0773>
78. Neumeier X, Santos SC, Caetano A, Kalbfleisch P. Entrepreneurship ecosystems and women entrepreneurs: A social capital and network approach. *Small Bus Econ*. 2019; 53:475–89. <https://doi.org/10.1007/s11187-018-9996-5>
79. Fernández-Pérez V, Jesús García-Morales V, Fernando Bustinza-Sánchez Ó. The effects of CEOs' social networks on organizational performance through knowledge and strategic flexibility. *Pers Rev*. 2012; 41(6):777–812. <https://doi.org/10.1108/00483481211263719>
80. Chen S, Ma H. Peer effects in decision-making: Evidence from corporate investment. *China J Account Res*. 2017; 10(2):167–88. <https://doi.org/10.1016/j.cjar.2016.11.002>
81. Gu J, Ardito L, Natalicchio A. CEO cognitive trust, governmental support and marketing innovation: Empirical evidence from Chinese small, medium and micro enterprises. *J Knowl Manag*. 2022; 26(9):2463–84. <https://doi.org/10.1108/JKM-06-2021-0454>
82. Gimmon E, Teng Y, He X. Political embeddedness and multi-layered interaction effects on the performance of private enterprises: Lessons from China. *Chin Manag Stud*. 2022; 16(3):571–88. <https://doi.org/10.1108/CMS-08-2020-0359>
83. Ren S, Wei W, Sun H, Xu Q, Hu Y, Chen X. Can mandatory environmental information disclosure achieve a win-win for a firm's environmental and economic performance? *J Clean Prod*. 2020; 250:119530. <https://doi.org/10.1016/j.jclepro.2019.119530>
84. Luo G, Liu Y, Zhang L, Xu X, Guo Y. Do governmental subsidies improve the financial performance of China's new energy power generation enterprises? *Energy*. 2021; 227:120432. <https://doi.org/10.1016/j.energy.2021.120432>
85. Hu HW, Xu D. Manager or politician? Effects of CEO pay on the performance of state-controlled Chinese listed firms. *J Manage*. 2022; 48(5):1160–87. <https://doi.org/10.1177/01492063211015301>
86. Bandiera O, Prat A, Hansen S, Sadun R. CEO behavior and firm performance. *J Polit Econ*. 2020; 128(4):1325–69.
87. Zhao L, Zhang L, Sun J, He P. Can public participation constraints promote green technological innovation of Chinese enterprises? The moderating role of government environmental regulatory enforcement. *Technol Forecast Soc*. 2022; 174:121198. <https://doi.org/10.1016/j.techfore.2021.121198>
88. Zhao X, Chen Y, Si D-K, Jiang C-Y. How does environmental legislation affect enterprise investment preferences? A quasi-natural experiment based on China's new environmental protection law. *Econ Anal Policy*. 2024; 81:834–55. <https://doi.org/10.1016/j.eap.2024.01.001>
89. Cumming D, Rui O, Wu Y. Political instability, access to private debt, and innovation investment in China. *Emerg Mark Rev*. 2016; 29:68–81. <https://doi.org/10.1016/j.ememar.2016.08.013>
90. Chen G, Lu P, Lin Z, Song N. Introducing Chinese private enterprise survey: Points and prospects. *Nankai Bus Rev Int*. 2019; 10(4):501–25. <https://doi.org/10.1108/NBRI-01-2019-0001>
91. Sheng W, Niu Z, Zhou X. Subjective status perception of entrepreneurs and firm-level international behavior: Evidence from Chinese private firms. *Chin Manag Stud*. 2024; 18(3):656–80. <https://doi.org/10.1108/CMS-02-2023-0055>
92. Fu T, Cai C, Jian Z. The illusion of “win-win” solution: Why environmental regulation in china promotes firm performance? *Struct Change Econ D*. 2020; 52:366–73. <https://doi.org/10.1016/j.strueco.2019.12.007>

93. Yan Y, Xu X. Does entrepreneur invest more in environmental protection when joining the communist party? Evidence from Chinese private firms. *Emerg Mark Financ Tr.* 2022; 58(3):754–75. <https://doi.org/10.1080/1540496X.2020.1848814>
94. Yang Y, Tang M. Finding the ethics of “red capitalists”: Political connection and philanthropy of Chinese private entrepreneurs. *J Bus Ethics.* 2020; 161:133–47. <https://doi.org/10.1007/s10551-018-3934-y>
95. Kraus MW, Piff PK, Mendoza-Denton R, Rheinschmidt ML, Keltner D. Social class, solipsism, and contextualism: How the rich are different from the poor. *Psychol Rev.* 2012; 119(3):546. <https://doi.org/10.1037/a0028756> PMID: 22775498
96. Uddin MMM. Does financial development stimulate environmental sustainability? Evidence from a panel study of 115 countries. *Bus Strateg Environ.* 2020; 29(6):2871–89. <https://doi.org/10.1002/bse.2591>
97. Di Zheng J, Schram A, Song T. Social status and prosocial behavior. *Exp Econ.* 2023; 26(5):1085–114. <https://doi.org/10.1007/s10683-023-09819-5>
98. Zhu C, Li N, Ma J, Qi X. CEOs’ digital technology backgrounds and enterprise digital transformation: The mediating effect of R&D investment and corporate social responsibility. *Corp Soc Resp Env Ma.* 2024; 31(3):2557–73. <https://doi.org/10.1002/csr.2704>
99. Zhang W, Chen H. The structure and measurement of the work values of Chinese civil servants: The case of Hangzhou city government. *Public Pers Manage.* 2015; 44(4):559–76. <https://doi.org/10.1177/0091026015607107>
100. Brychko M, Bilan Y, Lyeonov S, Streimikiene D. Do changes in the business environment and sustainable development really matter for enhancing enterprise development? *Sustain Dev.* 2023; 31(2):587–99. <https://doi.org/10.1002/sd.2410>
101. Prashar A. A bibliometric and content analysis of sustainable development in small and medium-sized enterprises. *J Clean Prod.* 2020; 245:118665. <https://doi.org/10.1016/j.jclepro.2019.118665>
102. Liu T, Liu M, Hu X, Xie B. The effect of environmental regulations on innovation in heavy-polluting and resource-based enterprises: Quasi-natural experimental evidence from China. *Plos One.* 2020; 15(12):e0239549. <https://doi.org/10.1371/journal.pone.0239549> PMID: 33270678
103. Zhao S, Zhang L, Peng L, Zhou H, Hu F. Enterprise pollution reduction through digital transformation? Evidence from Chinese manufacturing enterprises. *Technol Soc.* 2024; 77:102520. <https://doi.org/10.1016/j.techsoc.2024.102520>
104. Sun J, Wang F, Yin H, Zhao R. Death or rebirth? How small-and medium-sized enterprises respond to responsible investment. *Bus Strateg Environ.* 2022; 31(4):1749–62. <https://doi.org/10.1002/bse.2981>
105. Shao S, Hu Z, Cao J, Yang L, Guan D. Environmental regulation and enterprise innovation: A review. *Bus Strateg Environ.* 2020; 29(3):1465–78. <https://doi.org/10.1002/bse.2446>
106. Cheng F, Kuang X. Effect of senior executives’ overseas experience on corporate green innovation. *Plos One.* 2024; 19(5):e0296716. <https://doi.org/10.1371/journal.pone.0296716> PMID: 38696492
107. Schaltenbrand B, Foerstl K, Azadegan A, Lindeman K. See what we want to see? The effects of managerial experience on corporate green investments. *J Bus Ethics.* 2018; 150:1129–50. <https://doi.org/10.1007/s10551-016-3191-x>
108. Wang Y, Xu S, Wang Y. The consequences of employees’ perceived corporate social responsibility: A meta-analysis. *Bus Ethics: A Eur Rev.* 2020; 29(3):471–96. <https://doi.org/10.1111/beer.12273>
109. Li H, Zhang Y, Li Y. The impact of digital inputs on pollution reduction in Chinese manufacturing enterprises. *J Clean Prod.* 2023; 428:139393. <https://doi.org/10.1016/j.jclepro.2023.139393>
110. De Cuyper L, Clarysse B, Phillips N. Imprinting beyond the founding phase: How sedimented imprints develop over time. *Organ Sci.* 2020; 31(6):1579–600. <https://doi.org/10.1287/orsc.2020.1372>
